# Supplementary material
Source: publisher site journal article supplement (https://www.dovepress.com/article/444686)
Supplement: Supplementary file 1 [file get_supplementary_file.php]

**Supplementary Material**

**Table S1:** Korsmeyer-Peppas parameters for the release mechanism of CLA from KPEVs in PBS (pH 7.4) and SGF (pH 1.2).

| Releasing buffer | Korsmeyer-Peppas model parameters | | |
| --- | --- | --- | --- |
| *n* | *K* | R2 |
| PBS | 0.12 | 23.88 | 0.98 |
| SGF | 0.22 | 10.65 | 0.98 |

**
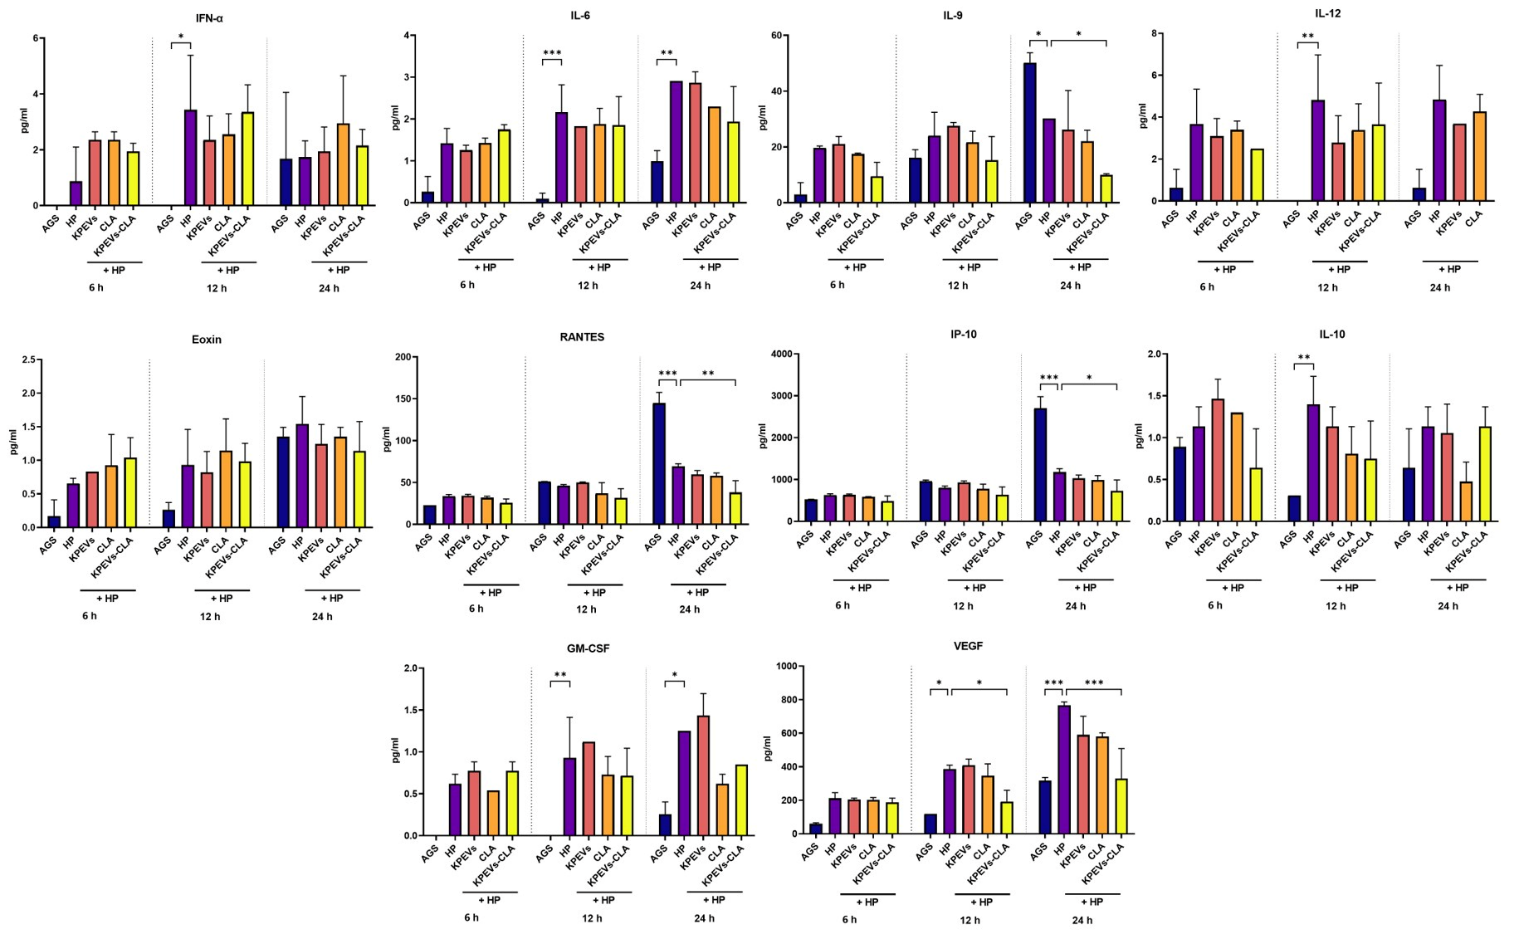
**

**Figure S1:** Multi-cytokines analysis of *H. pylori*-infected cells at 6, 12, and 24 h under 0.06-µg/ml KPEVs, CLA, and KPEVs-CLA. Concentrations of IFN-α, IL-6, IL-9, IL-12, eosin, RANTES, IP-10, IL-10, GM-CSF, and VEGF secretion. The results are presented as mean ± SD of two to three independent experiments. Statistical analysis was conducted using one-way ANOVA with Bonferroni *post hoc* tests; **p* ≤ 0.05, ***p* ≤ 0.01, and ****p* ≤ 0.001.

**Abbreviation:** HP, *H. pylori.*
